# Supplementary material for: Is the motivation to quit smoking greater if the smoker is going to quit smoking of their own free will or when advised by a health professional?
Source: PubMed Central journal article supplement (PMC9100290; doi:10.18332/tid/146961), 2022-05-13
Supplement: TID-20-47-s1.pdf [file TID-20-47-s1.pdf]

**Supplementary Table 1. Frequency distribution of the different categories of the variable ‘referred by’, for all participants and by sex (N=292)**

|                    | <b>All</b> | <b>Males</b> | <b>Females</b> | <b>p</b> |
|--------------------|------------|--------------|----------------|----------|
| <b>Referred by</b> | n (%)      | n (%)        | n (%)          | 0.229    |
| Primary Care       | 99 (33.9)  | 45 (32.8)    | 54 (34.8)      |          |
| Other Specialties  | 116 (39.7) | 61 (44.5)    | 55 (35.5)      |          |
| Own Free-Will      | 77 (26.4)  | 31 (22.6)    | 46 (29.7)      |          |

© 2022 de Granda-Orive J.I. et al.
